# Supplementary material
Source: PubMed Central journal article supplement (PMC1600004)

Group A:

Val<sup>178</sup>

Gly<sup>179</sup>

Ala<sup>181</sup>

Group B:

Phe<sup>111</sup>

Ser<sup>125</sup>

Pro<sup>140</sup>

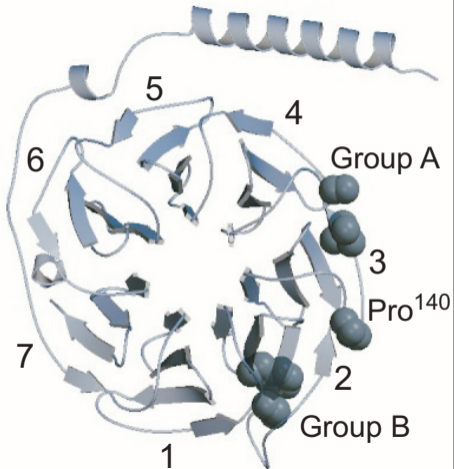

Supplement: pnas_0603945103_2.pdf [file pnas_0603945103_2.pdf]
